# Supplementary material
Source: publisher figshare collection journal article supplement (https://frontiersin.figshare.com/ndownloader/files/21103140)
Supplement: Supplementary file 1 [file 21103140]

Appendix 4 = Taxon age ranges used in tip-dating analysis, and their source.

| **Taxon** | **Age Range (Ma)** | **References** |
| --- | --- | --- |
| Acrophoca | 5.93 – 7.10 | Ehret et al., 2012 |
| Allocyon | 29.75 – 30.6 | Albright et al., 2008 |
| Allodesmus | 9.1 – 16.0 | Prothero et al., 2001; Boessenecker and Churchill, 2018 |
| Amphicticeps | 23 – 31.15 | Wang et al., 2005; Daxner-Höck et al., 2017 |
| Amphictis | 13.65 – 25.6 | Luterbacher et al., 2004; Agusti et al., 2001 |
| Arctodus | 0.01 – 1.8 | Scott and Cox, 1993 |
| Brachypsalis | 11 – 18.9 | Tedford et al., 2004; Schultz, 2016 |
| Broiliana | 13.65 – 23.03 | Baskin, 2004; Collier and Huin, 1978 |
| Desmatophoca | 16.0 – 23.03 | Prothero et al., 2001a; Barnes, 1987 |
| Devinophoca | 11.61 – 13.65 | Sabol and Holec, 2002 |
| Enaliarctos barnesi | 26.4 – 28.1 | Prothero et al., 2001b; Poust and Boessenecker, 2018 |
| Enaliarctos emlongi | 19.1 – 20.2 | Prothero et al., 2001a, 2001b; Poust and Boessenecker, 2018 |
| Enaliarctos mealsi | 21.5 – 24 | Scheirer and Magoon, 2007; Poust and Boessenecker, 2018 |
| Enaliarctos mitchelli | 19.1 – 24 | Prothero et al., 2001b; Scheirer and Magoon, 2007; Poust and Boessenecker, 2018 |
| Enaliarctos tedfordi | 27.40 – 28.10 | Prothero et al., 2001b; Poust and Boessenecker, 2018 |
| Hemicyon | 7.24 – 16.9 | Tedford and Frailey, 1976; Agusti et al., 2001; Bastl et al., 2018 |
| Hesperocyon | 24.8 – 40.4 | Wang, 1994 |
| Imagotaria | 7.30 – 11.61 | Chang et al., 1998; Scheirer and Magoon, 2007 |
| Kolponomos | 16.0 – 23.03 | Jacobs et al., 2009; Poust and Boessenecker, 2018 |
| Megalictis | 18.5 – 22.7 | Valenciano et al., 2016; Albright et al., 2008 |
| Mustelavus | 24.8 – 34.5 | Baskin and Tedford, 1996; Prothero et al., 2004; McDonald, 1972 |
| Neotherium | 14.5 – 16.4 | Pyenson et al., 2009 |
| Oligobunis | 15.97 – 25.9 | White, 1947; Morgan, 1993; Albright et al., 2008 |
| Paragale | 20.43 – 23.03 | Petter, 1967 |
| Phoberogale | 20.5 – 34 | de Bonis, 2013; Agusti et al., 2001 |
| Pinnarctidion | 17.3 – 24 | Poust and Boessenecker, 2018; Tedford, 1987 |
| Piscophoca | 5.93 – 7.10 | Ehret et al., 2012 |
| Plesiogale | 15.97 – 20.43 | Ginsburg and Bonneau, 1995; Agusti et al., 2001 |
| Pontolis | 6.5 – 8.7 | Prothero et al., 2001c |
| Potamotherium | 20.0 – 24.6 | Rabi et al., 2017; Agusti et al., 2001 |
| Promartes | 17.5 – 27.8 | Baskin, 1998; Morgan and Lucas, 2002; Tedford et al., 2004 |
| Promephitis | 3.2 – 11.1 | Wang and Qui, 2004; Agusti et al., 2001 |
| Proneotherium | 16.6 – 17.3 | Prothero et al., 2001a |
| Prototaria | 15.5 – 16.0 | Kohno et al., 1994 |
| Pseudobassaris | 27.6 – 30.3 | Luterbacher et al., 2004; Agusti et al., 2001 |
| Pteronarctos | 16.6 – 20.7 | Prothero et al., 2001a; Poust and Boessenecker, 2018 |
| Puijila | 21 - 24 | Jessberger, 1988; Rybczynski et al., 2009 |
| Semantor | 2.58 – 5.33 | Orlov, 1933 |
| Simocyon | 4.9 – 11.6 | Wang, 1997; Tedford et al., 2004; Spassov and Geraads, 2011 |
| Sthenictis | 9.0 – 17.5 | Tseng et al., 2009 |
| Stromeriella | 13.65 – 20.43 | Dehm, 1950; Ginsburg, 1969; Collier and Huin, 1979 |
| Temnocyon | 22.8 – 30.6 | Albright et al., 2008 |
| Thalassoleon | 5.3 – 8.0 | Barnes, 1989; Powell et al., 2007 |
| Zodiolestes | 17.5 – 24.8 | Hochstein, 2007; Alroy, 2000; Tedford et al., 2004 |

References

Agustı, J., Cabrera, L., Garcés, M., Krijgsman, W., Oms, O. and Parés, J.M., 2001. A calibrated mammal scale for the Neogene of Western Europe. State of the art. *Earth-Science Reviews*, *52*(4), pp.247-260.

Albright III, L.B., Woodburne III, M.O., Fremd III, T.J., Swisher III III, C.C., MacFadden III, B.J. and Scott III, G.R., 2008. Revised chronostratigraphy and biostratigraphy of the John Day Formation (Turtle Cove and Kimberly members), Oregon, with implications for updated calibration of the Arikareean North American Land Mammal Age. *The Journal of Geology*, *116*(3), pp.211-237.

Alroy, J., 2000. New methods for quantifying macroevolutionary patterns and processes. *Paleobiology*, *26*(4), pp.707-733.

Barnes, L.G., 1987. An early Miocene pinniped of the genus Desmatophoca (Mammalia: Otariidae) from Washington. *Contributions in Science*, *382*, pp.1-20.

Barnes, L.G., 1989. A new enaliarctine pinniped from the Astoria Formation, Oregon, and a classification of the Otariidae (Mammalia: Carnivora). *Contrib Sci Nat Hist Mus Los Angeles County*, *403*, pp.1-26.

Baskin, J.A., 2004. Bassariscus and Probassariscus (Mammalia, Carnivora, Procyonidae) from the early Barstovian (middle Miocene). *Journal of Vertebrate Paleontology*, *24*(3), pp.709-720.

Bastl, K., Nagel, D., Morlo, M. and Göhlich, U.B., 2018. The Carnivora (Mammalia) from the middle Miocene locality of Gračanica (Bugojno Basin, Gornji Vakuf, Bosnia and Herzegovina). *Palaeobiodiversity and Palaeoenvironments*, pp.1-13.

Boessenecker, R.W. and Churchill, M., 2018. The last of the desmatophocid seals: a new species of Allodesmus from the upper Miocene of Washington, USA, and a revision of the taxonomy of Desmatophocidae. *Zoological Journal of the Linnean Society*, *184*(1), pp.211-235.

Chang, A.S., Grimm, K.A. and White, L.D., 1998. Diatomaceous sediments from the Miocene Monterey Formation, California; a lamina-scale investigation of biological, ecological, and sedimentary processes. *Palaios*, *13*(5), pp.439-458.

A. Collier and J. Huin. 1979. Decouverte d'un gisement d'age Burdigalien inferieur dans des sables sous-jacents aux Faluns de Touraine. Etude de la faune de rongeurs et interet biostratigraphique . *Comptes Rendus de l'Academie des Sciences de Paris, serie D* **289**:249-252

Daxner-Höck, G., Badamgarav, D., Barsbold, R., Bayarmaa, B., Erbajeva, M., Göhlich, U.B., Harzhauser, M., Höck, E., Höck, V., Ichinnorov, N. and Khand, Y., 2017. Oligocene stratigraphy across the Eocene and Miocene boundaries in the Valley of Lakes (Mongolia). *Palaeobiodiversity and palaeoenvironments*, *97*(1), pp.111-218.

de Bonis, L., 2012. Ursidae (Mammalia, Carnivora) from the Late Oligocene of the “Phosphorites du Quercy”(France) and a reappraisal of the genus Cephalogale Geoffroy, 1862. *Geodiversitas*, *35*(4), pp.787-815.

Dehm, R., 1950. *Die Raubtiere aus dem Mittel-Miocän (Burdigalium) von Wintershof-West bei Eichstätt in Bayern*(No. 58). Verlag der Bayerischen Akademie der Wissenschaften.

Ehret, D.J., Macfadden, B.J., Jones, D.S., Devries, T.J., Foster, D.A. and SALAS‐GISMONDI, R.O.D.O.L.F.O., 2012. Origin of the white shark Carcharodon (Lamniformes: Lamnidae) based on recalibration of the Upper Neogene Pisco Formation of Peru. *Palaeontology*, *55*(6), pp.1139-1153.

Ginsburg, L., 1969. Le plus ancien morse du Monde. *Bulletin du Museum National d'Histoire Naturelle*, *41*(4), pp.995-998.

Ginsburg, L. and Bonneau, M., 1995. La succession des faunes de mammifères miocènes de Pontigné (Maine-et-Loire, France). *Bulletin du Muséum national d’Histoire Naturelle, Sciences de la Terre*, *4*(16), pp.313-328.

Hochstein, J.L., 2007. A new species of Zodiolestes (Mammalia, Mustelidae) from the early Miocene of Florida. *Journal of Vertebrate Paleontology*, *27*(2), pp.532-534.

Jacobs, L.L., Fiorillo, A.R., Nishida, Y.O.S.U.K.E. and Fitzgerald, E.M.G., 2009. Mid-cenozoic marine mammals from Alaska. *Papers on geology, vertebrate paleontology, and biostratigraphy in Honor of Michael O. Woodburne*, pp.171-184.

Jessberger, E.K., 1988. 40Ar‐39Ar dating of the Haughton impact structure. *Meteoritics*, *23*(3), pp.233-234.

Kohno, N., Barnes, L.G. and Hirota, K., 1994. Miocene fossil pinnipeds of the genera Prototaria and Neotherium (Carnivora; Otariidae; Imagotariinae) in the North Pacific Ocean: evolution, relationships and distribution. *Island Arc*, *3*(4), pp.285-308.

Luterbacher, H.P., 2004. The paleogene period. *A geologic time scale 2004*, pp.384-408.

L. J. Macdonald. 1972. Monroe Creek (early Miocene) microfossils from the Wounded Knee area, South Dakota. *South Dakota Geological Survey Report of Investigations* **105**:1-43

Morgan, G.S., 1993. Mammalian biochronology and marine-nonmarine correlations in the Neogene of Florida. *Florida Geological Survey, Special Publication*, *37*, pp.55-66.

Morgan, G.S. and Lucas, S.G., 2002. *Miocene mammalian faunas and biostratigraphy of the Zia formation, Northern Albuquerque basin, Sandoval County, New Mexico*. éditeur non identifié.

Orlov, J.A., 1933. Semantor macrurus (ordo Pinnipedia, fam. Semantoridae fam. nova) aus den Neogen-Ablagerungen Westsibiriens. *Travaux de l’Institut Paléozoologique, Académie des Sciences, URSS*, *2*, pp.165-268.

Petter, G., 1967. Paragale huerzeleri nov. gen., nov. sp., mustelide nouveau de l'Aquitanien de l'Allier. *Bulletin de la Societé géologique de France*, *7*(1), pp.19-23.

Poust, A.W. and Boessenecker, R.W., 2018. Expanding the geographic and geochronologic range of early pinnipeds: New specimens of Enaliarctos from Northern California and Oregon. *Acta Palaeontologica Polonica*, *63*(1), pp.25-40.

Powell II, C.L., Barron, J.A., Sarna-Wojcicki, A.M., Clark, J.C., Perry, F.A., Brabb, E.E. and Fleck, R.J., 2007. *Age, stratigraphy, and correlations of the Late Neogene Purisima Formation, central California coast ranges* (No. 1740). Geological Survey (US).

Prothero, D.R., Bitboul, C.Z., Moore, G.W. and Niem, A.R., 2001. Magnetic stratigraphy and tectonic rotation of the Oligocene Alsea, Yaquina, and Nye formations, Lincoln County, Oregon.

Prothero, D.R., Bitboul, C.Z., Moore, G.W. and Moore, E.J., 2001. Magnetic stratigraphy of the lower and middle Miocene Astoria Formation, Lincoln County, Oregon.

Prothero, D.R., Emry, R.J. and Woodburne, M.O., 2004. The Chadronian, Orellan, and Whitneyan North American Land Mammal Ages. *Late Cretaceous and Cenozoic Mammals of North America. Columbia University Press, New York*, pp.156-168.

Pyenson, N.D., Irmis, R.B., Lipps, J.H., Barnes, L.G., Mitchell Jr, E.D. and McLeod, S.A., 2009. Origin of a widespread marine bonebed deposited during the middle Miocene Climatic Optimum. *Geology*, *37*(6), pp.519-522.

Rabi, M., Bastl, K., Botfalvai, G., Evanics, Z. and Peigné, S., 2018. A new carnivoran fauna from the late Oligocene of Hungary. *Palaeobiodiversity and Palaeoenvironments*, pp.1-13.

Rybczynski, N., Dawson, M.R. and Tedford, R.H., 2009. A semi-aquatic Arctic mammalian carnivore from the Miocene epoch and origin of Pinnipedia. *Nature*, *458*(7241), p.1021.

Sabol, M.. and Holec, P. 2002. Temporal and spatial distribution of Miocene mammals in the Western Carpathians (Slovakia). *Geologica Carpathica*, *53*(4), pp.269-279.

Scheirer, A.H. and Magoon, L.B., 2007. Age, distribution, and stratigraphic relationship of rock units in the San Joaquin Basin province, California. *Petroleum systems and geologic assessment of oil and gas in the San Joaquin Basin province, California: US Geologic Survey Professional Paper*.

Schultz, G.E., 2016. A skull and jaws of Brachypsalis modicus (Mammalia, Carnivora, Mustelidae, Oligobuninae) from late Miocene Clarendon Fauna of Donley County, Texas. *New Mexico Museum of Natural History and Science Bulletin*, *74*, pp.249-259.

Scott, E. and Cox, S.M., 1993. Arctodus simus (Cope, 1879) from Riverside County, California. *PaleoBios*, *15*, pp.27-36.

Spassov, N. and Geraads, D., 2011. A skull of Simocyon primigenius (Roth & Wagner, 1854)(Carnivora, Ailuridae) from the late Miocene of Karaslari (Republic of Macedonia), with remarks on the systematics and evolution of the genus. *Neues Jahrbuch für Geologie und Paläontologie-Abhandlungen*, *262*(2), pp.151-161.

Tedford, R.H. and Frailey, D., 1976. Review of some Carnivora (Mammalia) from the Thomas Farm local fauna (Hemingfordian, Gilchrist County, Florida). American Museum novitates; no. 2610.

Tedford, R.H., 1987. Faunal succession and biochronology of the Arikareean through Hemphillian inter val (Late Oligocene through earliest Pliocene epochs) in North America. *Cenozoic mammals of North America*, pp.153-210.

Tedford, R.H., Albright III, L.B., Barnosky, A.D., Ferrusquia-Villafranca, I., Hunt Jr, R.M., Storer, J.E., Swisher III, C.C., Voorhies, M.R., Webb, S.D. and Whistler, D.P., 2004. Mammalian biochronology of the Arikareean through Hemphillian interval (late Oligocene through early Pliocene epochs). *Late Cretaceous and Cenozoic Mammals of North America: Biostratigraphy and Geochronology. Columbia University Press, New York*, pp.169-231.

Tseng, Z.J., O'Connor, J.K., Wang, X. and Prothero, D.R., 2009. The first old world occurrence of the North American mustelid Sthenictis (Mammalia, Carnivora). *Geodiversitas*, *31*(4), pp.743-752.

T. E. White. 1942. The Lower Miocene mammal fauna of Florida. *Bulletin of the Museum of Comparative Zoology* 92(1):1-49

Valenciano, A., Baskin, J.A., Abella, J., Pérez-Ramos, A., Álvarez-Sierra, M.Á., Morales, J. and Hartstone-Rose, A., 2016. Megalictis, the bone-crushing giant mustelid (Carnivora, Mustelidae, Oligobuninae) from the Early Miocene of North America. *PloS one*, *11*(4), p.e0152430.

Wang, X., 1994. Phylogenetic systematics of the Hesperocyoninae (Carnivora, Canidae). Bulletin of the AMNH; no. 221.

Wang, X., 1997. New cranial material of Simocyon from China, and its implications for phylogenetic relationship to the red panda (Ailurus). *Journal of Vertebrate Paleontology*, *17*(1), pp.184-198.

Wang, X. and Qiu, Z., 2004. Late Miocene Promephitis (Carnivora, Mephitidae) from China. *Journal of Vertebrate Paleontology*, *24*(3), pp.721-731.

Wang, X., McKenna, M.C. and Dashzeveg, D., 2005. Amphicticeps and Amphicynodon (Arctoidea, Carnivora) from Hsanda Gol Formation, central Mongolia and phylogeny of basal arctoids with comments on zoogeography. *American Museum Novitates*, pp.1-60.

White, T.E., 1947. *Additions to the Miocene fauna of North Florida*.
